# Supplementary material
Source: publisher figshare collection journal article supplement (https://frontiersin.figshare.com/ndownloader/files/34993525)

## *Supplementary Material*

### 1 China's UWUEs between 2003 and 2018.

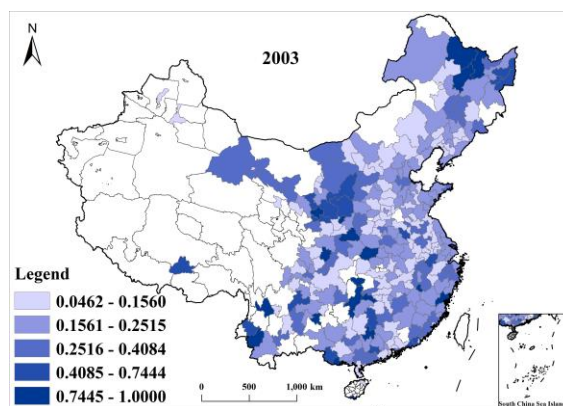

(a)

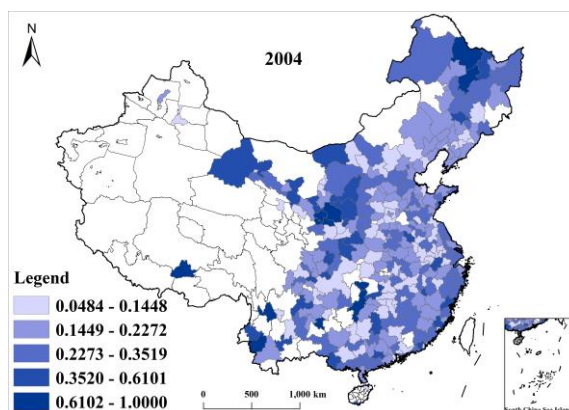

(b)

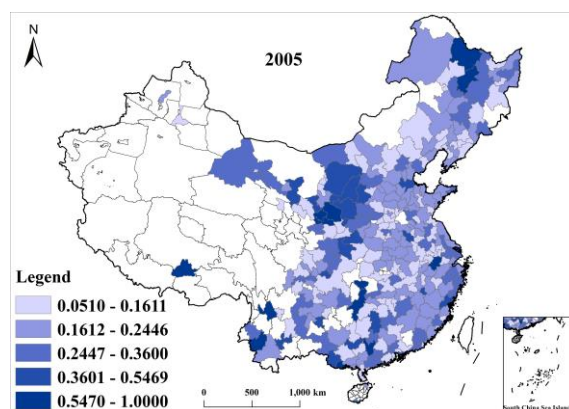

(c)

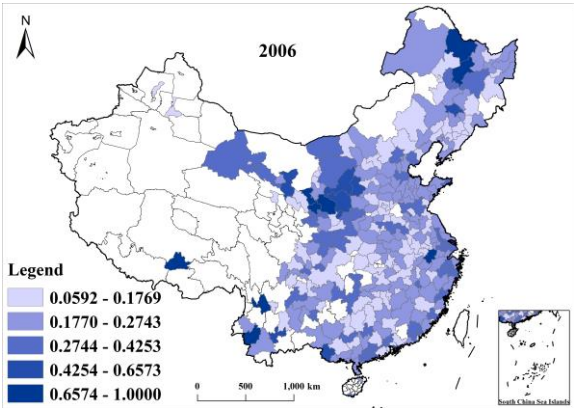

(d)

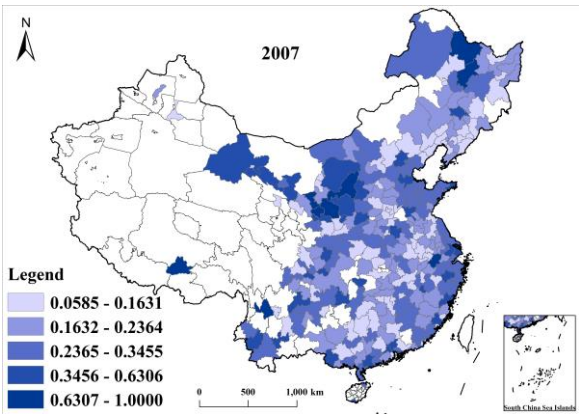

(e)

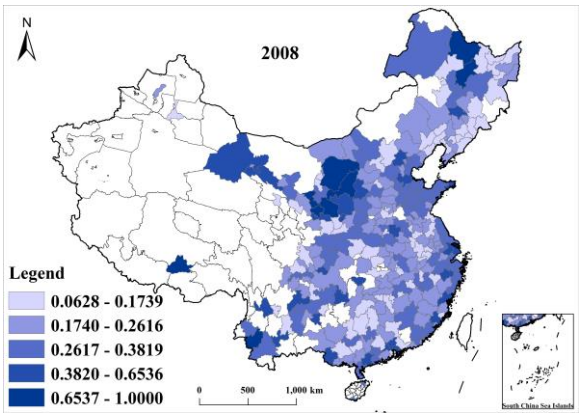

(f)

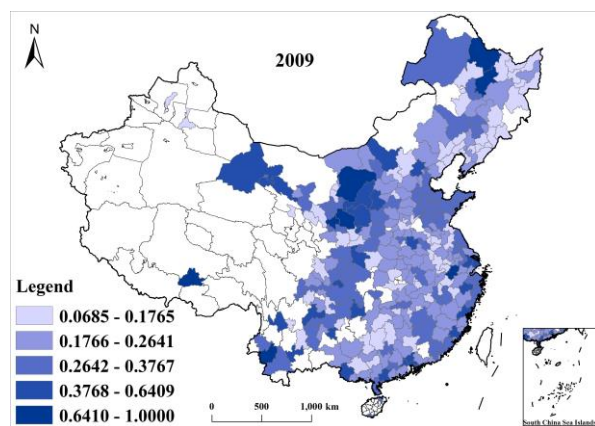

(g)

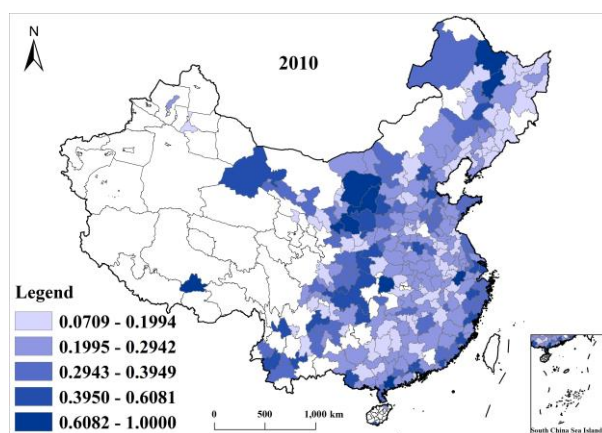

(h)

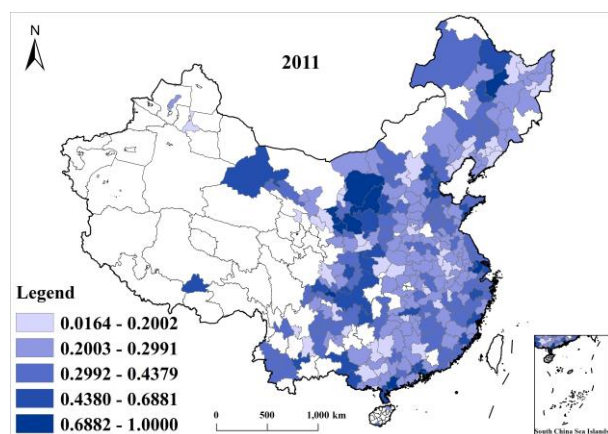

(i)

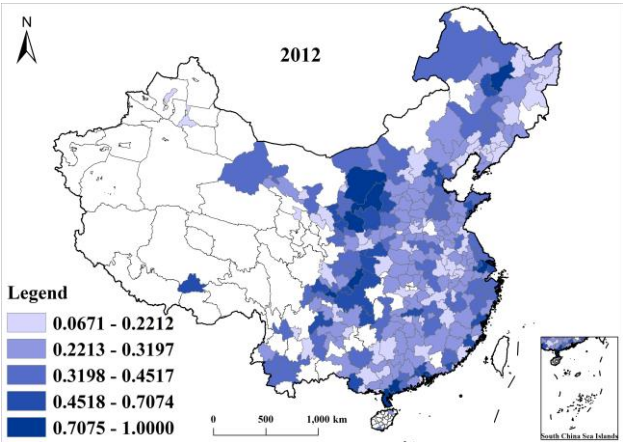

(k)

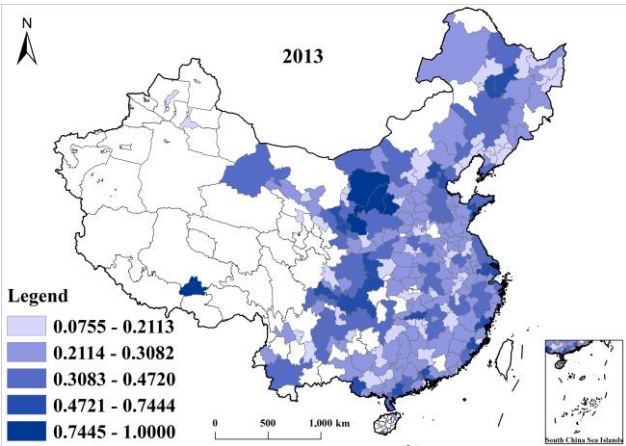

(l)

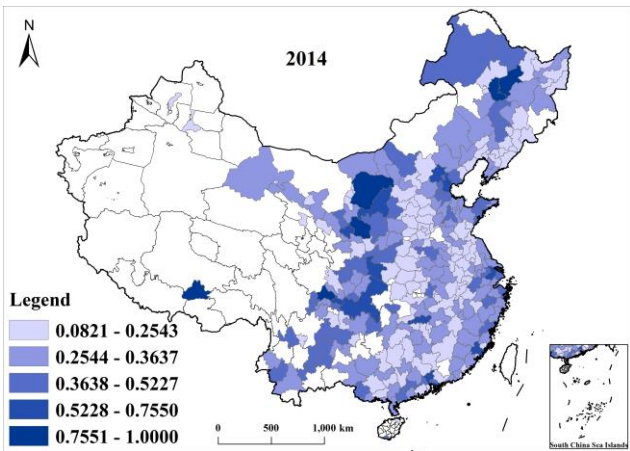

(m)

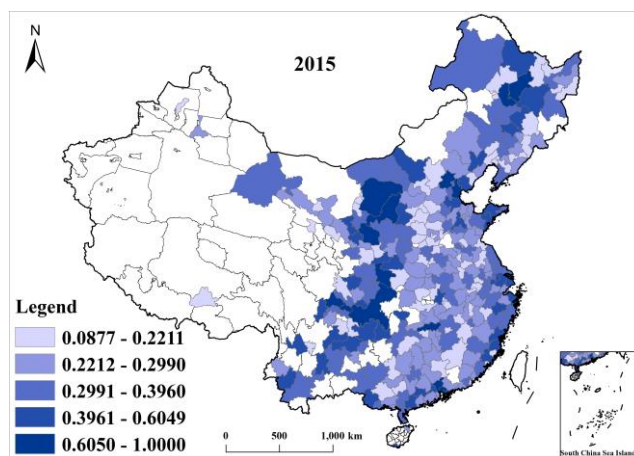

(n)

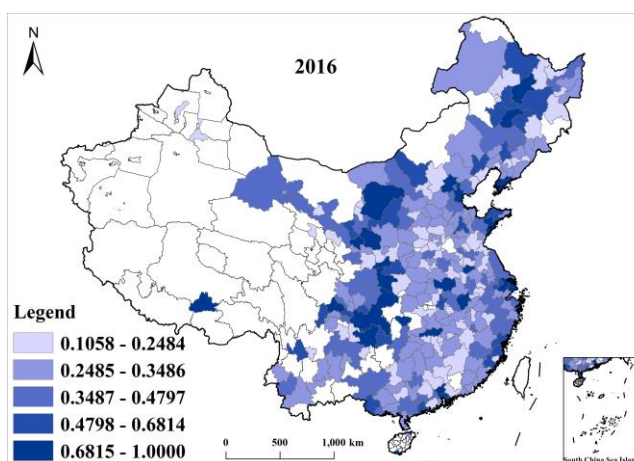

(o)

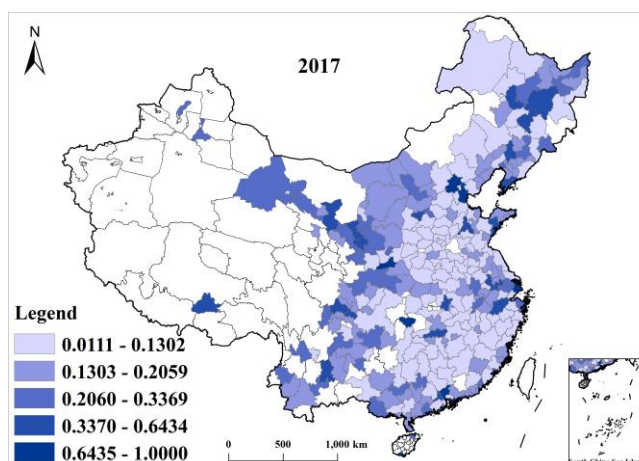

(p)



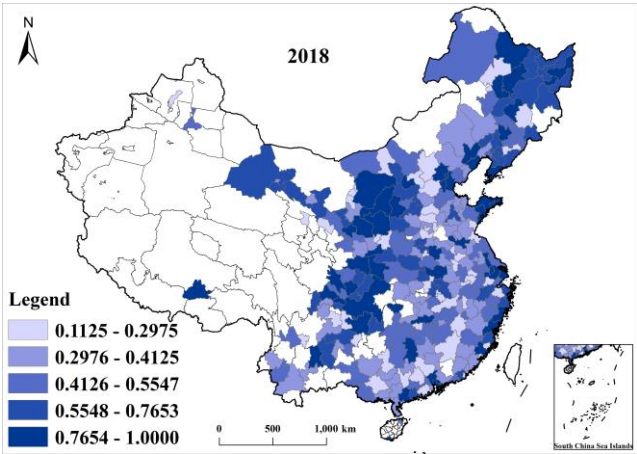

(q)

Supplement: Supplementary file 1 [file 34993525]
